# Supplementary figures and images for: Obesity induces preadipocyte CD36 expression promoting inflammation via the disruption of lysosomal calcium homeostasis and lysosome function
Source: PubMed Central journal article supplement — eBioMedicine. 2020 Jun 6;56:102797. doi: 10.1016/j.ebiom.2020.102797 (PMC7281849; doi:10.1016/j.ebiom.2020.102797), 2020-06-06

Fig.4b

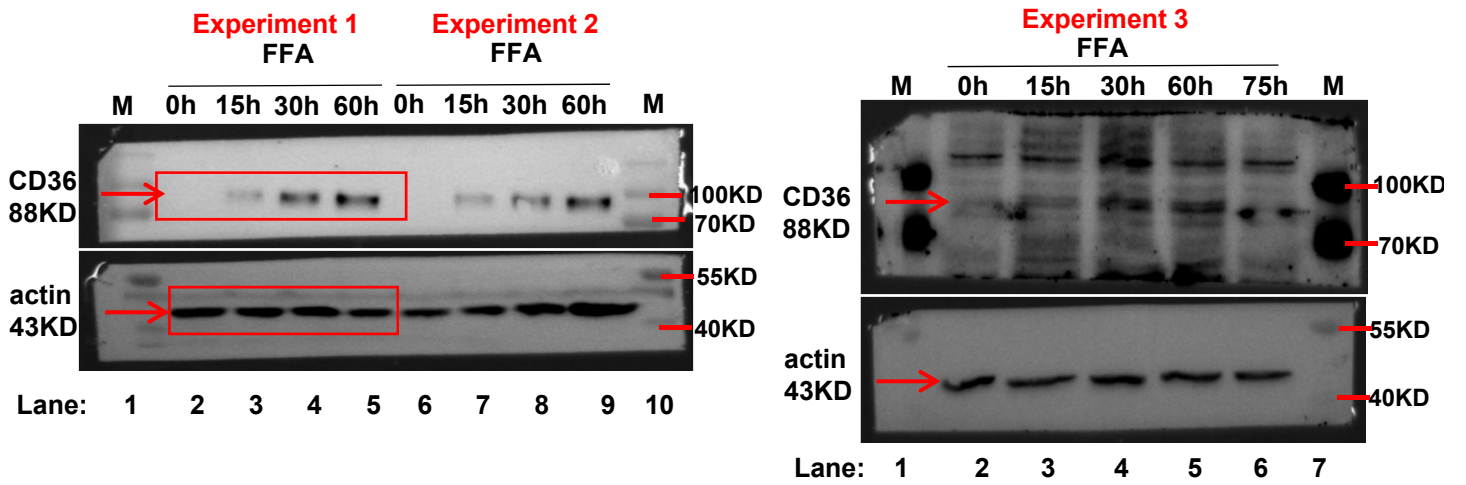

Fig.5a-1

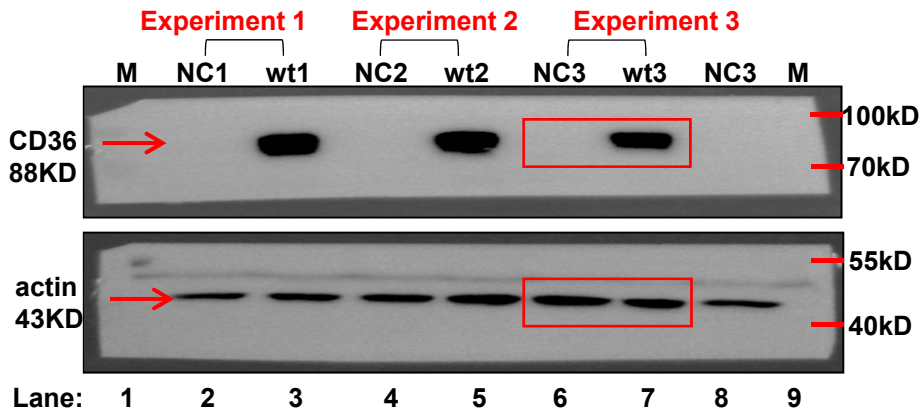

Fig.5a-2

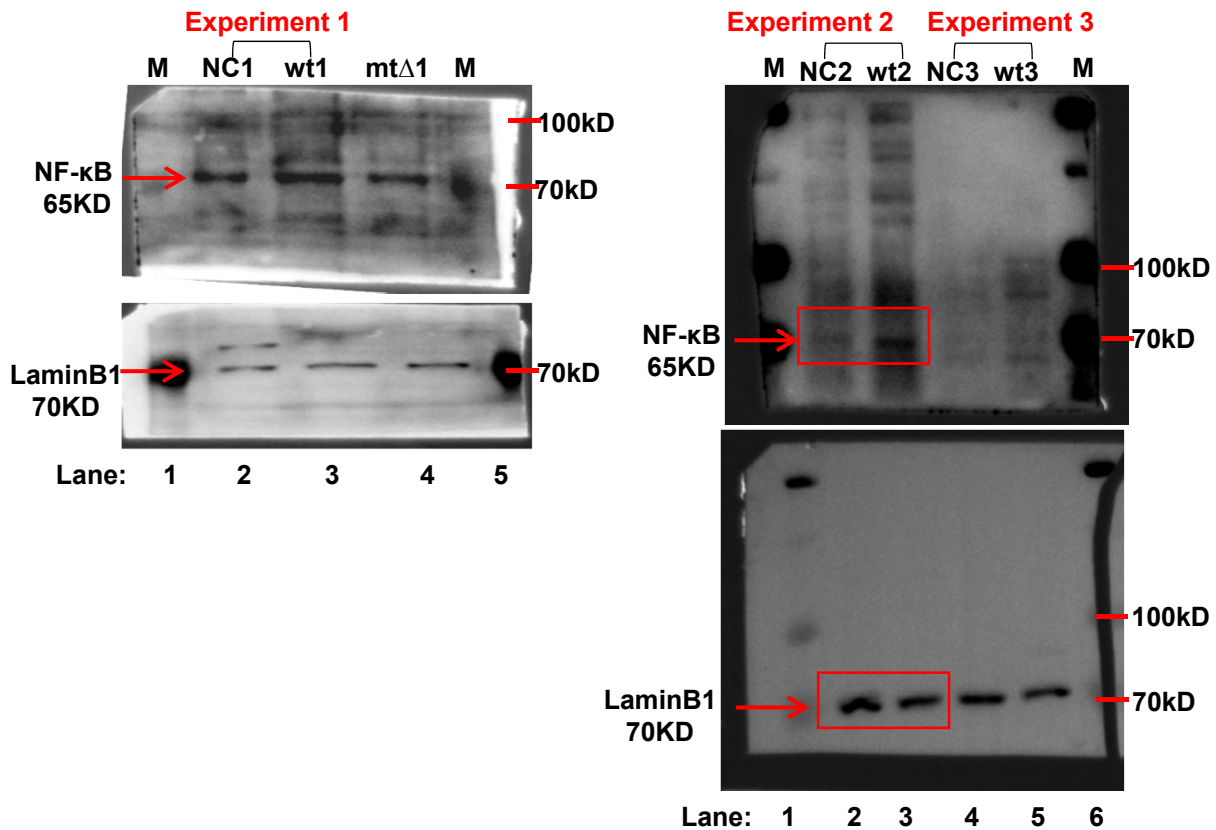

Fig.5a-3

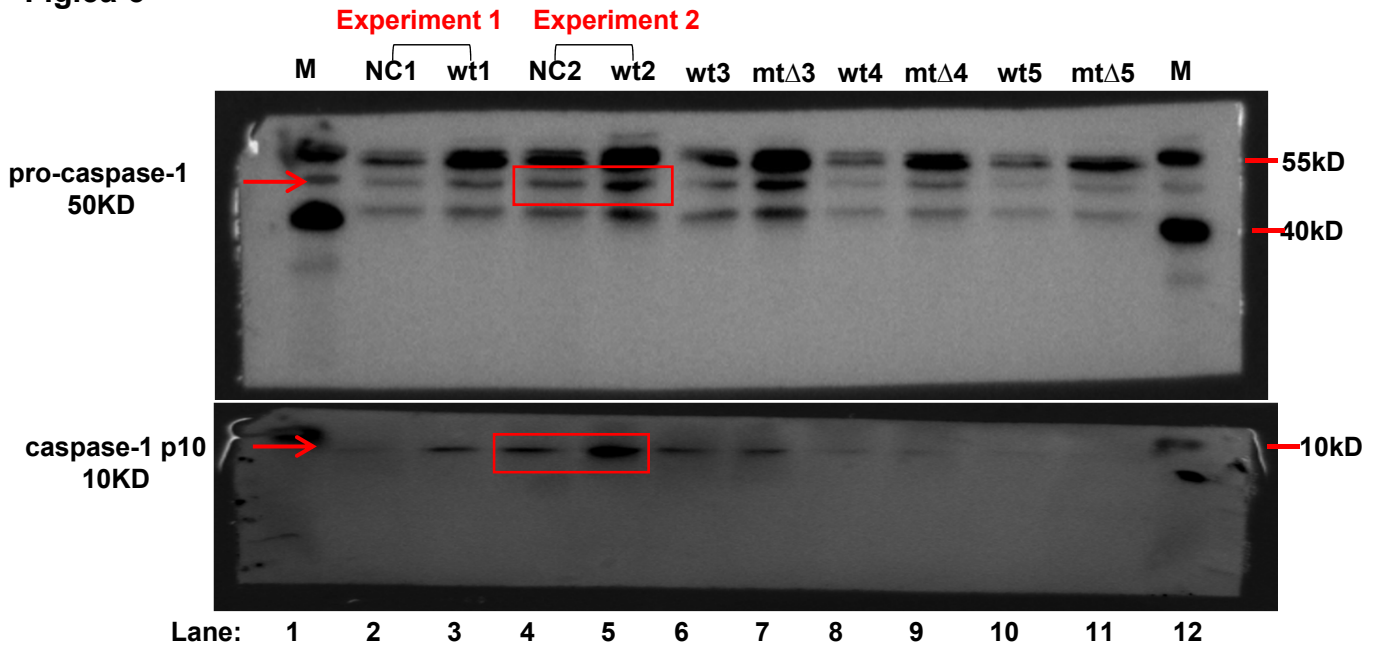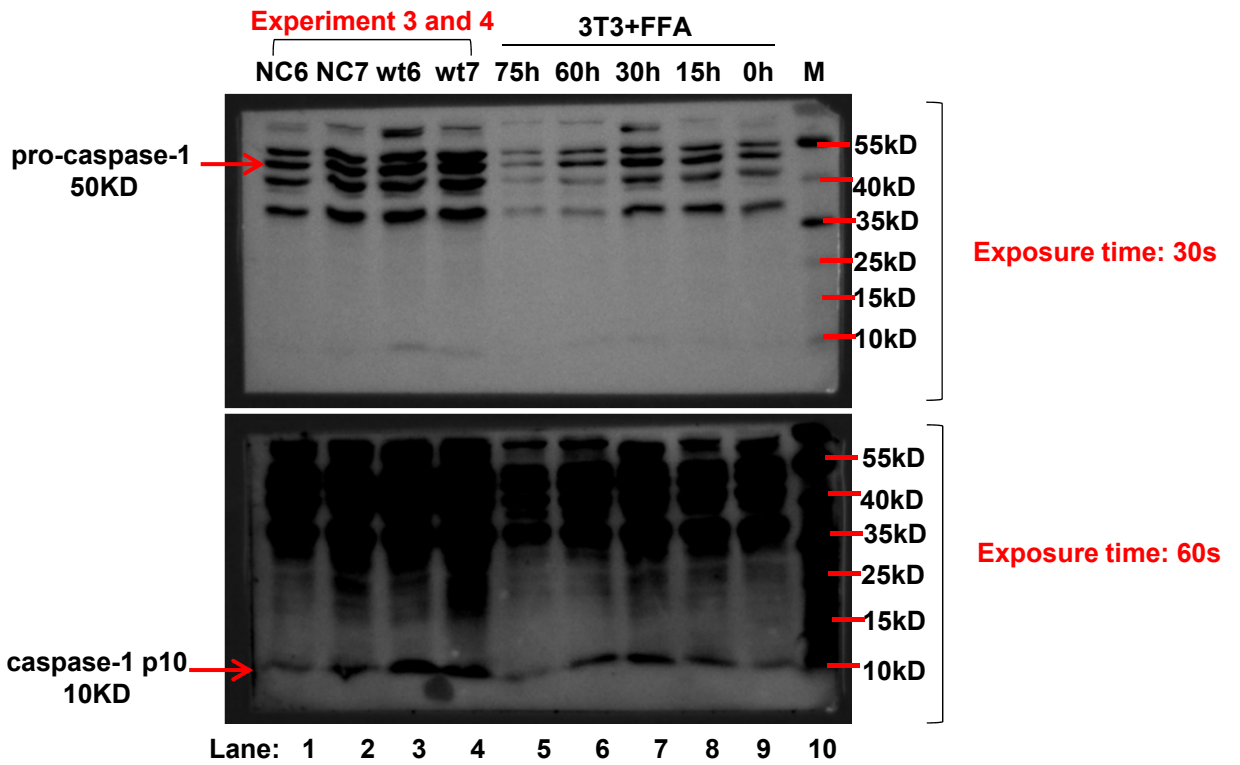

Fig.5a-4

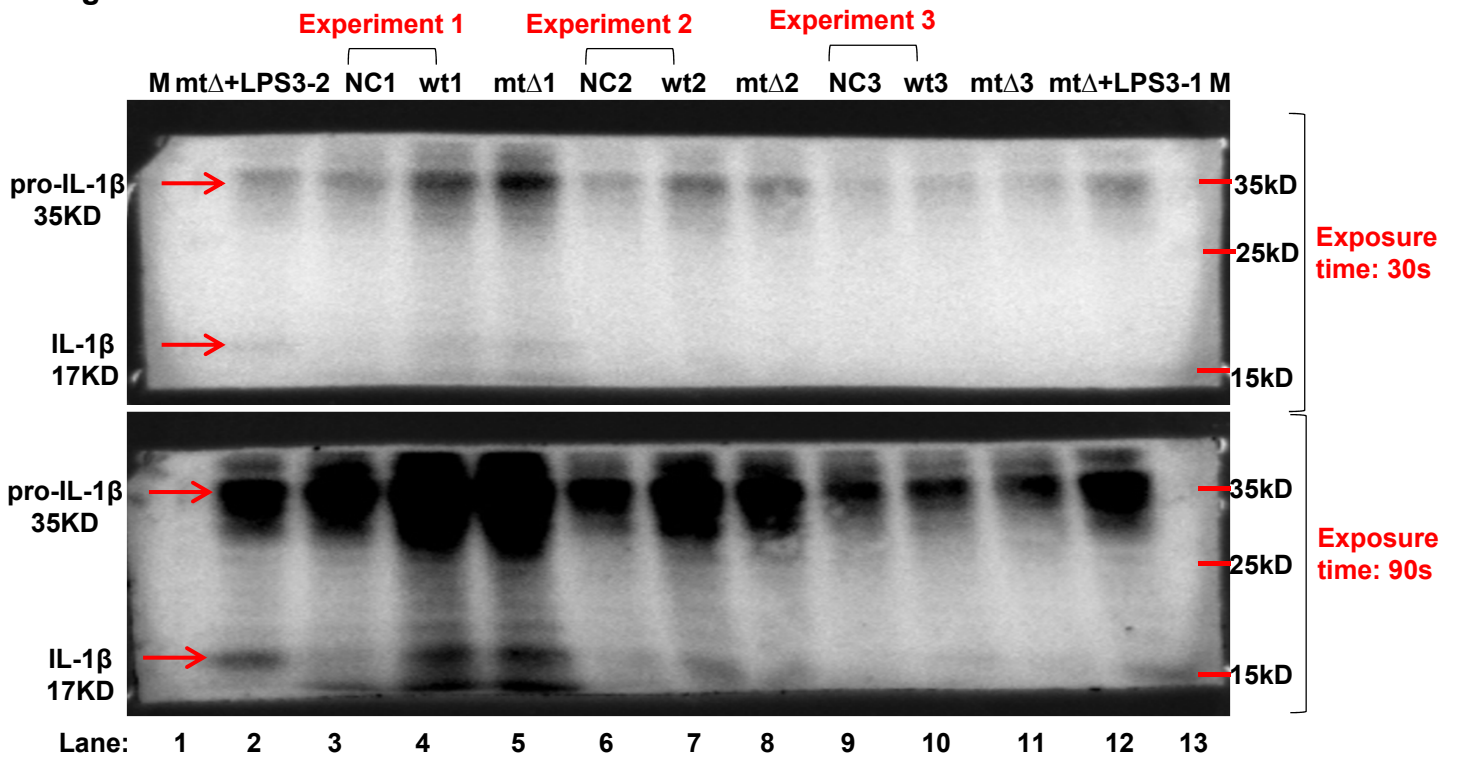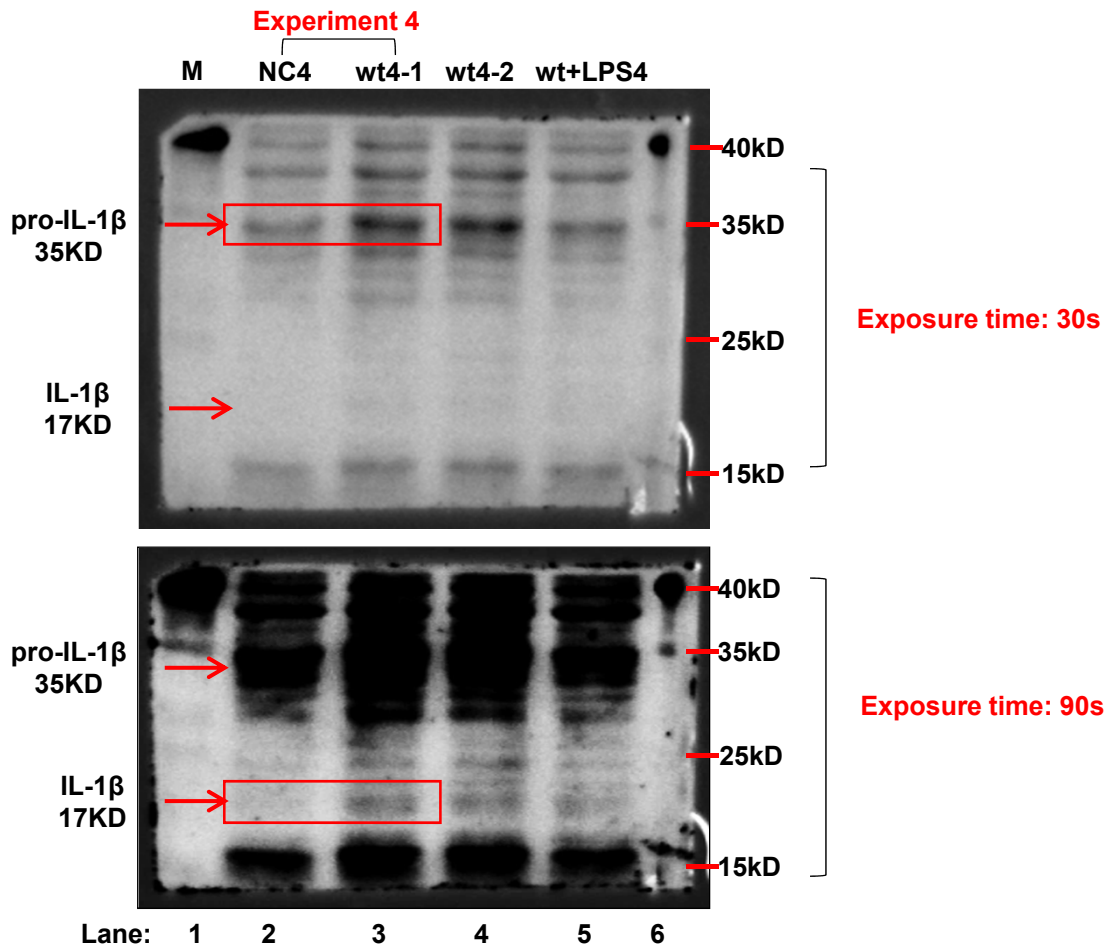

Fig.6a

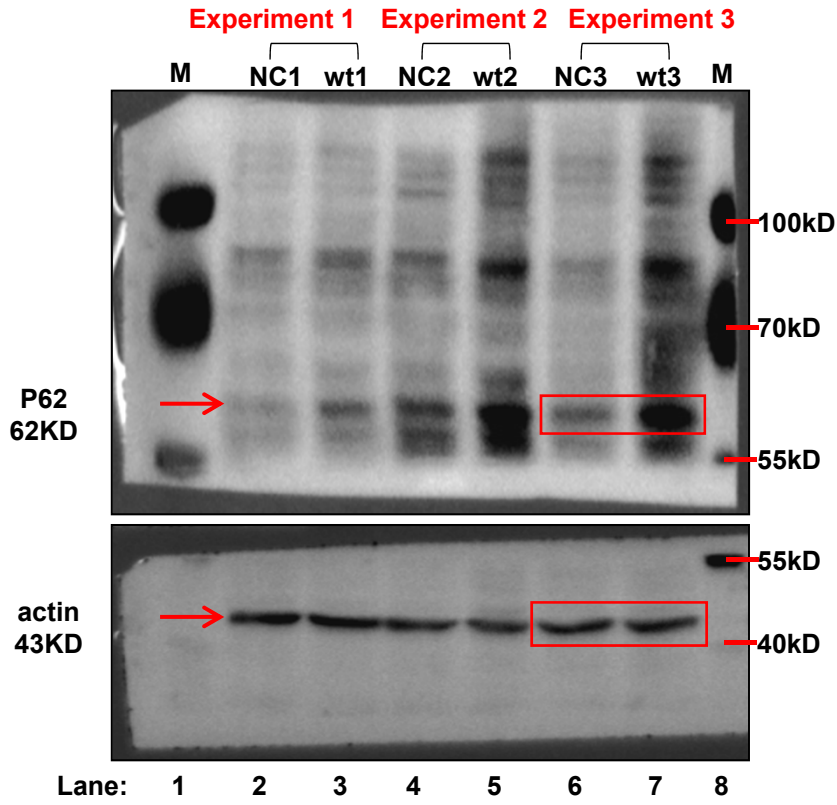

Fig.7b

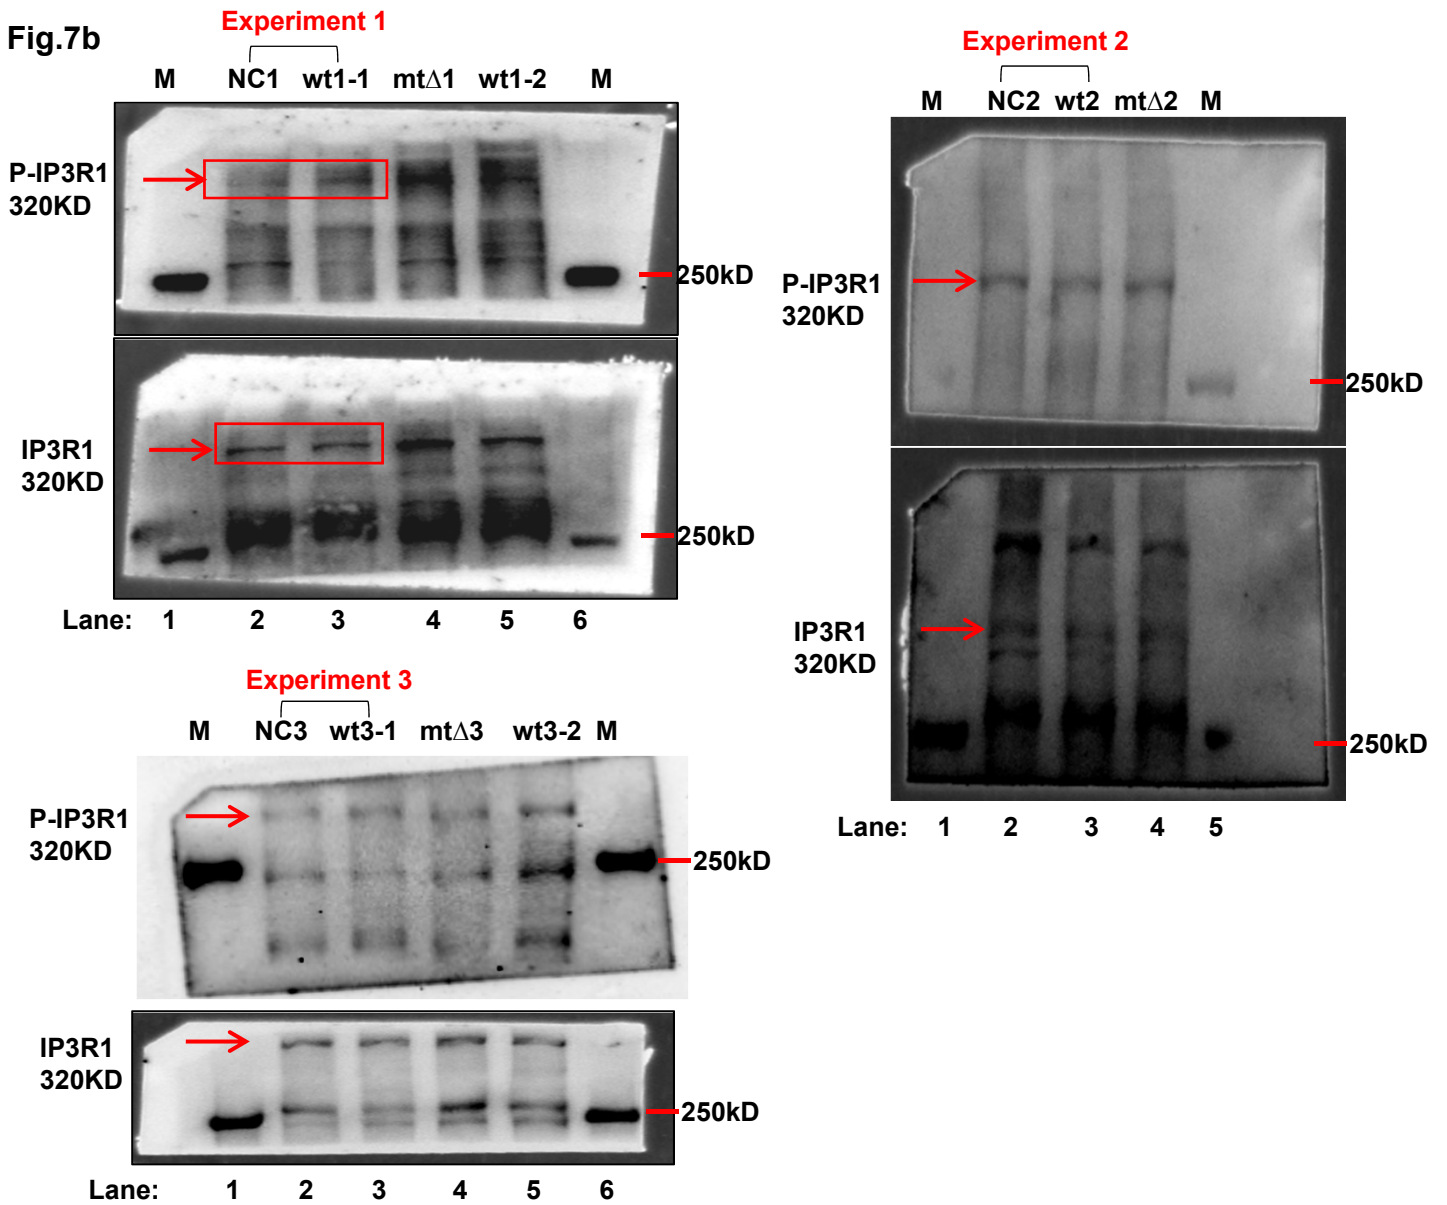

Fig.8a

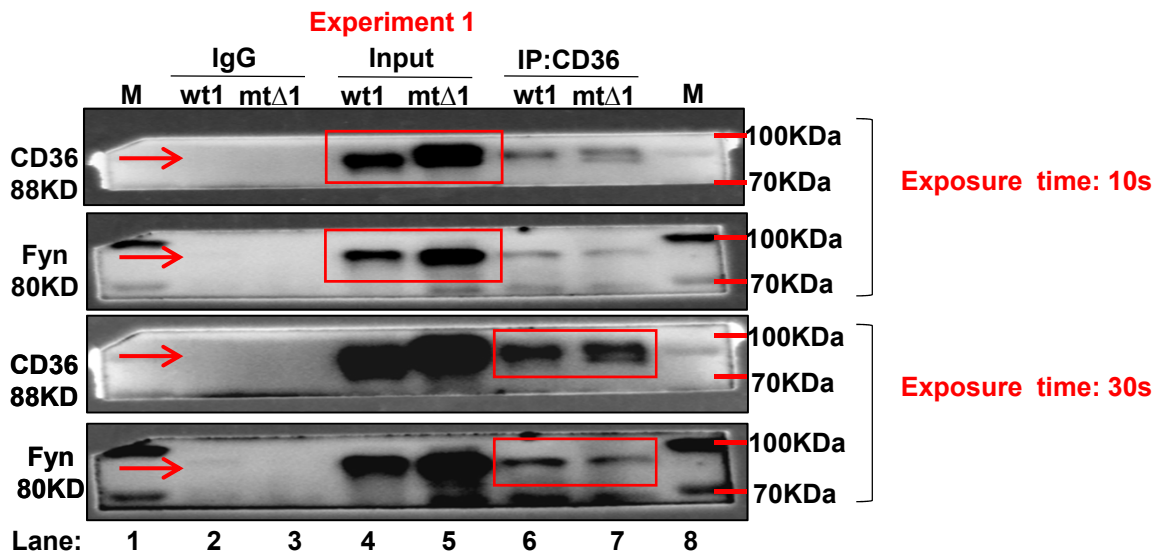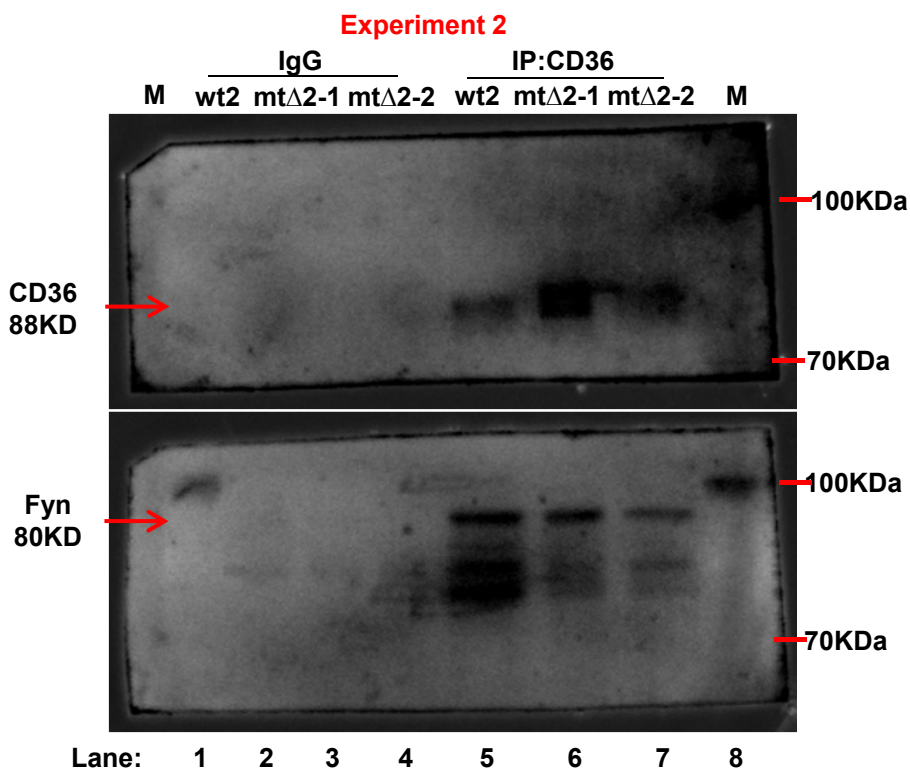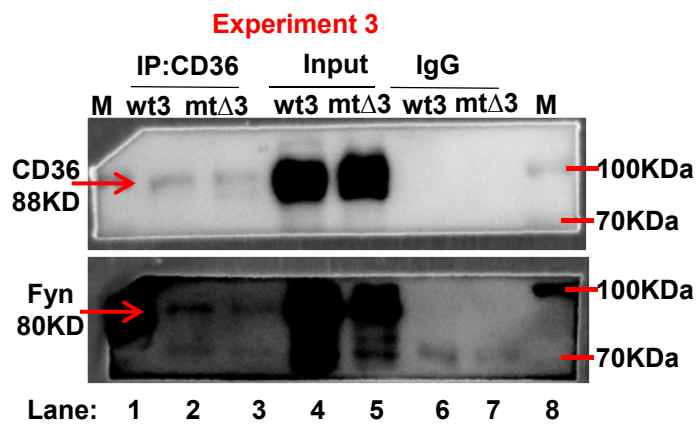

Fig.8b

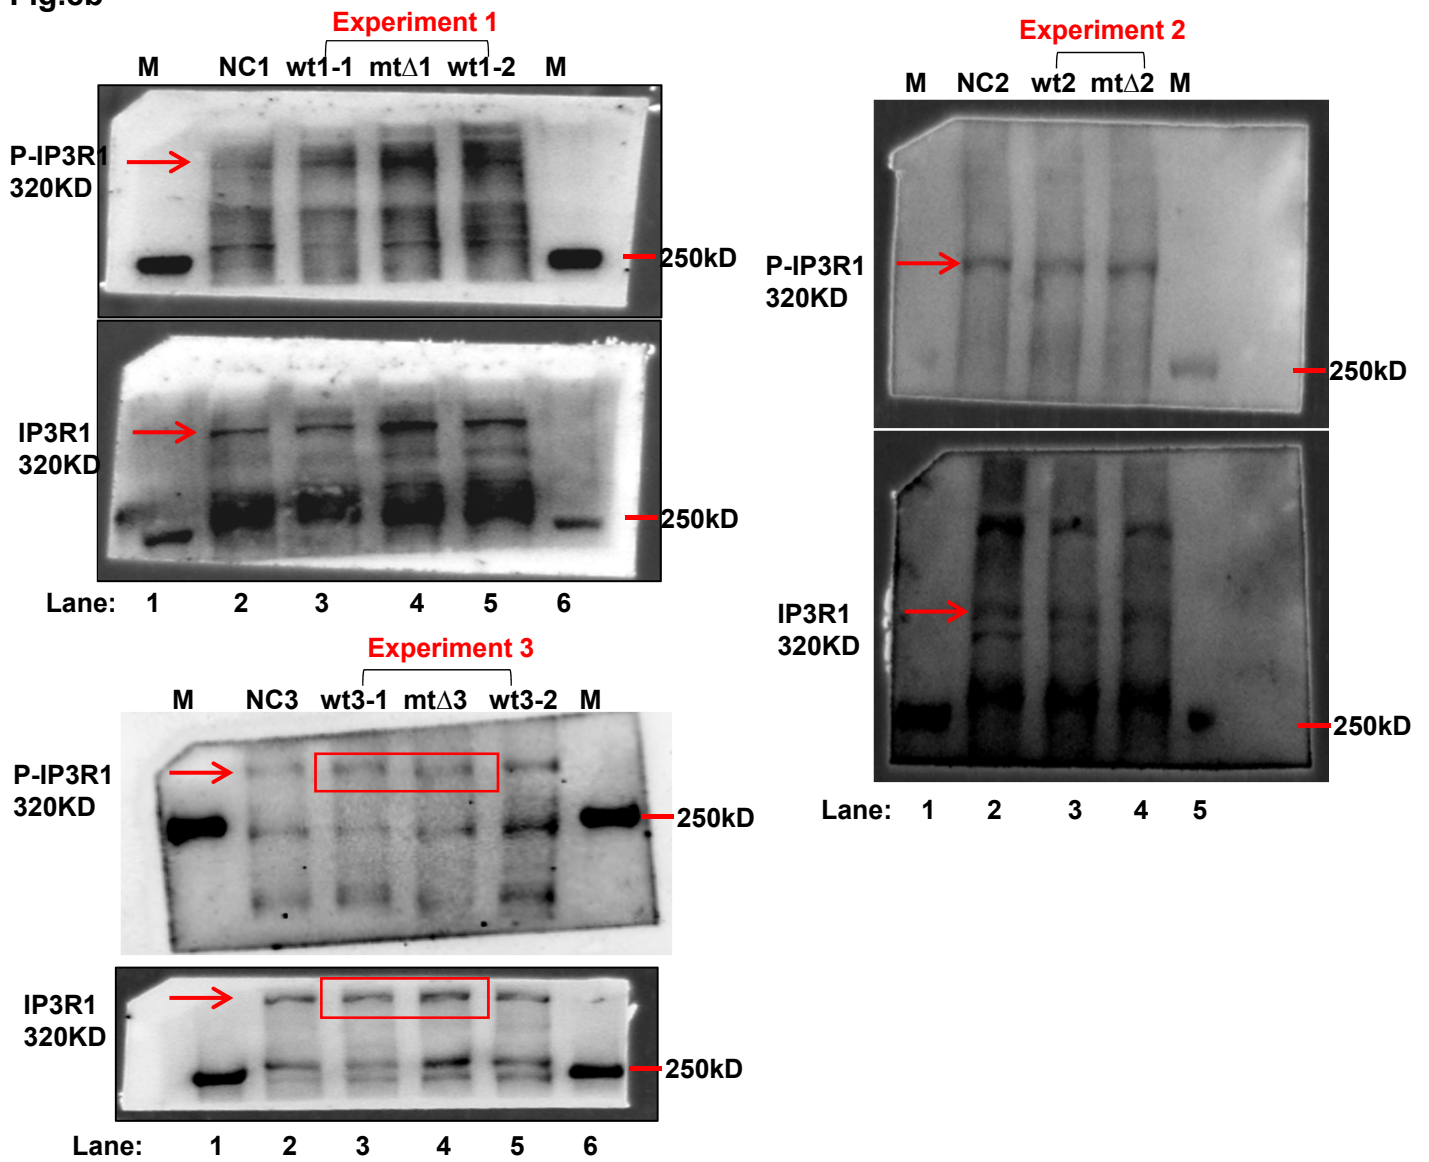

Fig.8f-1

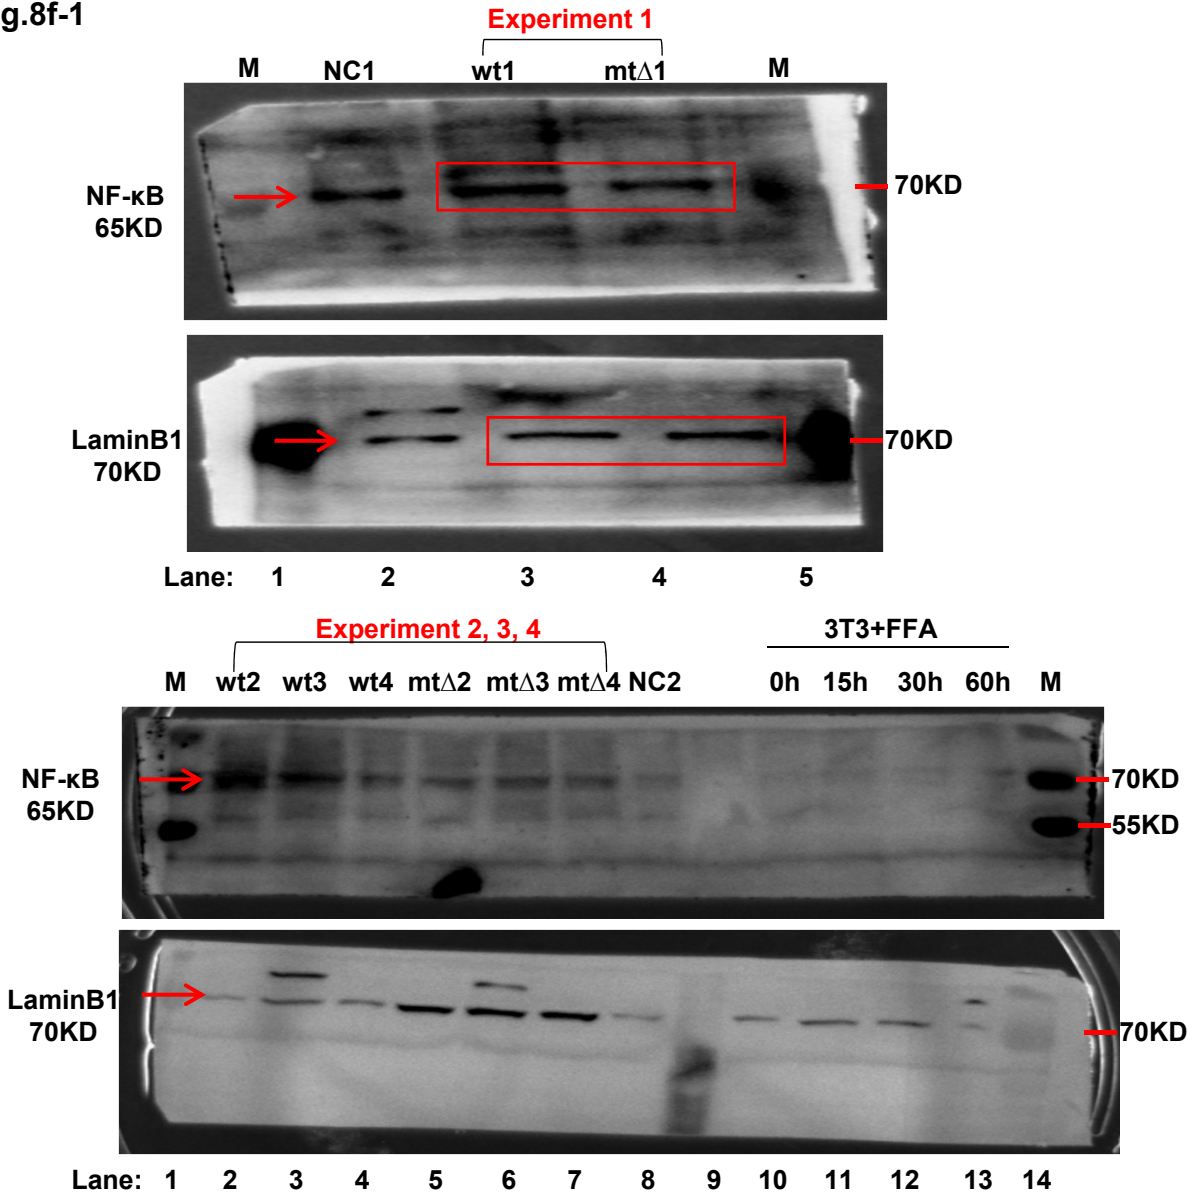

Fig.8f-2

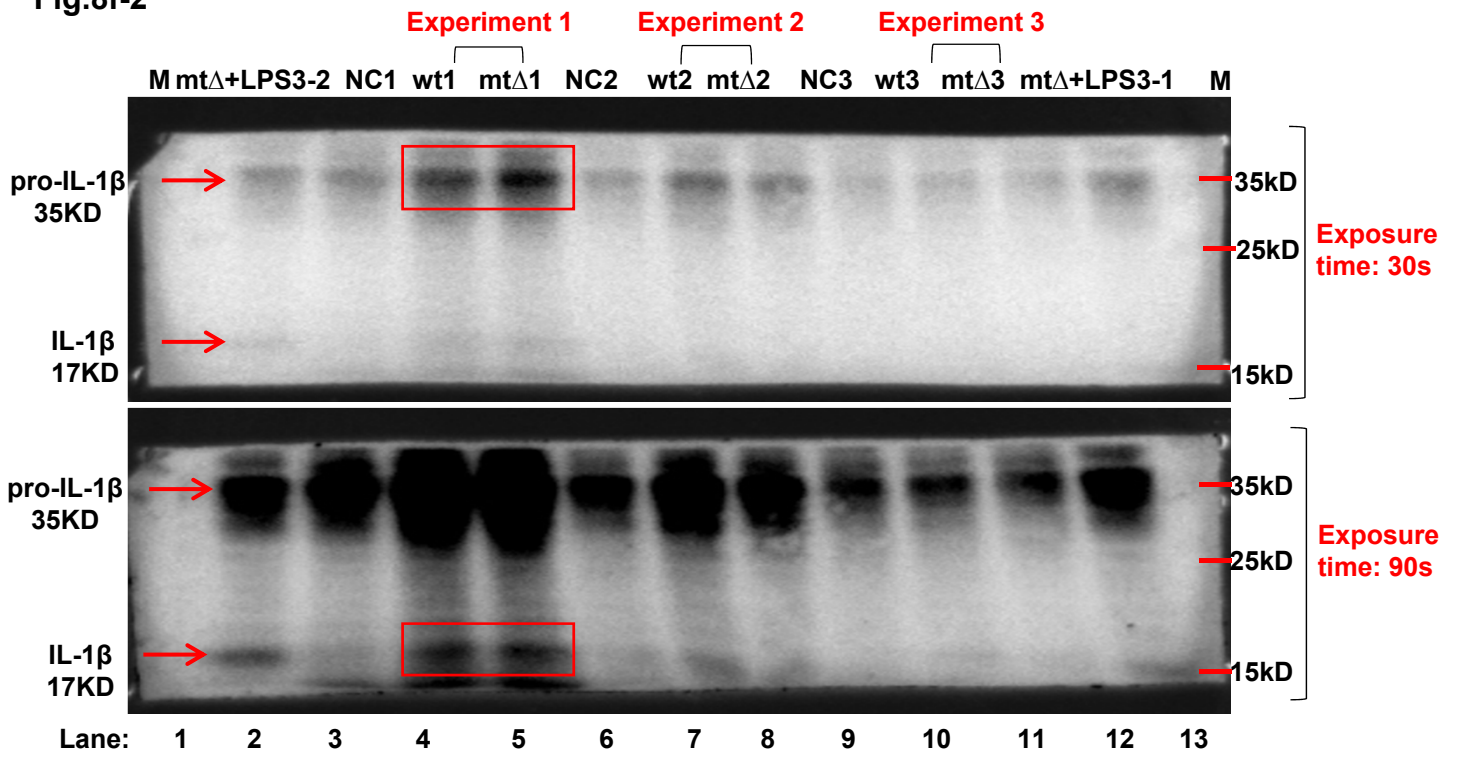

Supplement: mmc1.pdf [file mmc1.pdf]
